# Supplementary material
Source: HighWire-hosted journal article supplement (doi:10.1101/rna.078678.121)
Supplement: Supplemental_Legends_Tables.docx [file Supplemental_Legends_Tables.docx]

**SUPPLEMENTAL FIGURE LEGENDS**

**Supplemental Figure 1.** **Association of editing frequency with characteristics of regulatory sequence in murine APOBEC1-mediated C-to-U mRNA editing sites.** A-C**.** Association of editing frequency with number of mismatches and AU content (%). D-F Association of editing frequency with different regulatory sequence motifs. Mismatches were determined in comparison to the same regulatory sequence motif in *Apob* mRNA (as reference).

**Supplemental Figure 2.** **Association of editing frequency with characteristics of downstream sequence in murine APOBEC1-mediated C-to-U mRNA editing sites.** A.Association of editing frequency with spacer length. B. Association of editing frequency with spacer AU content (%). C-F. Association of editing frequency with and AU content of successive segments downstream of the edited cytidine.

**Supplemental Figure 3.** **Association of editing frequency with secondary structure-related characteristics in C-to-U mRNA editing sites.** A: distribution of edited cytidine location in secondary structure regardless of the overall secondary structure. B: association of editing frequency with edited cytidine location in secondary structure. C: distribution of free tail orientation in editing sites. D: association of editing frequency with free tail orientation in editing sites. E: association of editing frequency with 3’ free tail length. * *P*<.05; *** *P*<.0001. *r*: Pearson correlation coefficient.

**Supplemental Figure 4. Secondary structure minimum free energy density.** A and B: distribution of the RNA editing sites based on the minimal free energy density of the editing cassette secondary structure (MFEden). C: association of MFEden with GC content of the editing cassette. D: association between MFEden and ratio of main stem-loop bases to total bases count. E: association of the edited cytosine location with MFEden. F: association of MFEden with editing frequency.

**Supplemental Figure 5.** **Association of secondary structure-related characteristics with dominant co-factor pattern in APOBEC1-mediated C-to-U mRNA editing sites.** A**.** Distribution of mooring sequence location presented in the context of different dominant co-factor patterns. B. Distribution of free tail orientation in secondary structure among editing sites, presented in the context of different dominant co-factor patterns.

| Supplemental table 1. Multivariable linear regression model for individual nucleotides surrounding edited cytosine (-10 to +20) in mouse APOBEC1-dependent C-to-U mRNA editing sites. | | | |
| --- | --- | --- | --- |
| Location of nucleotide relative to edited C | Base preference | ß (95% CI) | *P* value |
| Nucleotide -8 | GU | 8.15 [3.0,13.3] | 0.002 |
| Nucleotide -7 | C | 12.7 [4.3, 21.0] | 0.003 |
| Nucleotide -6 | G | 7.1 [0.6, 13.7] | 0.03 |
| Nucleotide -5 | U | 5.2 [1.0, 9.5] | 0.02 |
| Nucleotide -2 | AUC | 13.5 [9.0, 17.9] | <0.001 |
| Nucleotide -1 | AU | 15.9 [4.0, 27.9] | 0.01 |
| Nucleotide +1 | AGU | 19.5 [12.5, 26.6] | <0.001 |
| Nucleotide +3 | G | 12.2 [7.4, 16.9] | <0.001 |
| Nucleotide +4 | G | 15.9 [10.9, 21.0] | <0.001 |
| Nucleotide +7 | C | 10.3 [1.5, 19.2] | 0.02 |
| Nucleotide +9 | G | 9.7 [1.4, 18.0] | 0.02 |
| Nucleotide +12 | AUC | 7.5 [1.0, 13.9] | 0.02 |
| Nucleotide +16 | AC | 6.6 [2.2, 11.0] | 0.004 |
| Nucleotide +17 | AU | 5.6 [0.5, 10.8] | 0.03 |
| Nucleotide +18 | AU | 6.6 [1.5, 11.8] | 0.01 |
| Nucleotide +19 | AC | 5.65 [1.3, 10.0] | 0.01 |
| ß: represents average change (%) in the editing frequency compared to the reference group (non-preferred group)  CI: confidence interval | | | |

| Supplemental table 2. Descriptive data of regulatory-spacer-mooring cassette in mouse APOBEC1-dependent C-to-U mRNA editing sites. | | | | | |
| --- | --- | --- | --- | --- | --- |
| Parameter | N | Mean | SD | Min | Max |
| *Sequence-related features* | | | | | |
| Mismatches in regulatory (motif A) | 177 | 1.72 | 0.94 | 0 | 3 |
| Mismatches in regulatory (motif B) | 177 | 3.35 | 1.12 | 0 | 5 |
| Mismatches in regulatory (motif C) | 177 | 3.78 | 0.99 | 0 | 5 |
| Mismatches in regulatory (motif D) | 177 | 7.12 | 1.76 | 0 | 10 |
| AU content (%) of regulatory (motif A) | 177 | 75.14 | 26.00 | 0 | 100 |
| AU content (%) of regulatory (motif B) | 177 | 73.44 | 22.10 | 0 | 100 |
| AU content (%) of regulatory (motif C) | 177 | 63.00 | 23.40 | 0 | 100 |
| AU content (%) of regulatory (motif D) | 177 | 68.25 | 18.40 | 10 | 100 |
| Spacer length | 177 | 5.08 | 3.67 | 0 | 20 |
| Mismatches in spacer | 152 | 2.54 | 1.09 | 0 | 4 |
| AU content (%) of spacer | 172 | 72.65 | 23.39 | 0 | 100 |
| Mismatches in mooring | 177 | 2.13 | 1.81 | 0 | 8 |
| AU content (%) of downstream sequence +1 to +5 | 177 | 72.88 | 19.46 | 0 | 100 |
| AU content (%) of downstream sequence +6 to +10 | 177 | 69.94 | 22.78 | 0 | 100 |
| AU content (%) of downstream sequence +11 to +15 | 177 | 72.43 | 20.65 | 20 | 100 |
| AU content (%) of downstream sequence +16 to +20 | 177 | 66.21 | 22.56 | 0 | 100 |
| GC content (%) of regulatory and downstream sequence +1 to +20 | 177 | 30.34 | 12.49 | 3.33 | 73.33 |
| *Secondary structure-related features* | | | | | |
| Proportion of the bases that constitute main stem-loop | 172 | 0.61 | 0.18 | 0.28 | 1 |
| Length of 5’ free tail | 172 | 4.25 | 3.93 | 0 | 15 |
| Length of 3’ free tail | 172 | 5.27 | 4.65 | 0 | 17 |
| SD: standard deviation | | | | | |

| Supplemental table 3. Comparing three subgroups of mouse APOBEC1-dependent C-to-U mRNA editing sites based on co-factor dominance. | | | | | | | | | | |
| --- | --- | --- | --- | --- | --- | --- | --- | --- | --- | --- |
| Parameter | RBM47-dominant | | | A1CF-dominant | | | Co-dominant | | | *P value* |
| N | Mean | SD | N | Mean | SD | N | Mean | SD |
| Mismatches in regulatory (motif A) | 60 | 1.48 | 0.93 | 5 | 1.80 | 0.45 | 7 | 1.14 | 0.69 | .4 |
| Mismatches in regulatory (motif B) | 60 | 3.05 | 1.13 | 5 | 3.60 | 0.55 | 7 | 3.00 | 0.82 | .51 |
| Mismatches in regulatory (motif C) | 60 | 3.58 | 1.05 | 5 | 3.80 | 0.45 | 7 | 4.29 | 1.11 | .1 |
| Mismatches in regulatory (motif D) | 60 | 6.63 | 1.90 | 5 | 7.40 | 0.55 | 7 | 7.29 | 1.50 | .44 |
| AU content (%) of regulatory (motif A) | 60 | 82.22 | 18.88 | 5 | 80.00 | 18.26 | 7 | 85.71 | 17.82 | .8 |
| AU content (%) of regulatory (motif B) | 60 | 76.33 | 16.67 | 5 | 84.00 | 16.73 | 7 | 82.86 | 17.99 | .5 |
| AU content (%) of regulatory (motif C) | 60 | 62.67 | 22.84 | 5 | 72.00 | 17.89 | 7 | 62.86 | 21.38 | .6 |
| AU content (%) of regulatory (motif D) | 60 | 69.50 | 14.89 | 5 | 78.00 | 13.04 | 7 | 72.86 | 12.54 | .4 |
| Spacer length | 60 | 5.20 | 3.93 | 5 | 7.20 | 5.45 | 7 | 7.86 | 5.08 | .2 |
| Mismatches in spacer (in 4-base cassette) | 40 | 2.43 | 1.20 | 4 | 2.75 | 1.50 | 6 | 3.83 | 0.41 | .02 |
| Mismatches in spacer (relative abundance (%)) | 60 | 61.81 | 30.89 | 5 | 61.67 | 36.13 | 7 | 82.14 | 37.40 | .2 |
| AU content (%) of spacer | 60 | 77.30 | 17.83 | 5 | 72.08 | 18.14 | 7 | 71.37 | 15.24 | .5 |
| Mismatches in mooring | 60 | 1.12 | 1.30 | 5 | 2.00 | 2.55 | 7 | 2.86 | 0.38 | .004 |
| AU content (%) of downstream sequence +1 to +5 | 60 | 77.33 | 14.94 | 5 | 80.00 | 20.00 | 7 | 71.43 | 15.74 | .7 |
| AU content (%) of downstream sequence +6 to +10 | 60 | 77.67 | 18.81 | 5 | 60.00 | 24.49 | 7 | 57.14 | 13.80 | .01 |
| AU content (%) of downstream sequence +11 to +15 | 60 | 80.33 | 15.40 | 5 | 72.00 | 17.89 | 7 | 65.71 | 15.12 | 0.06 |
| AU content (%) of downstream sequence +16 to +20 | 60 | 70.33 | 20.00 | 5 | 72.00 | 10.95 | 7 | 77.14 | 17.99 | .6 |
| Proportion of the bases that constitute main stem-loop | 60 | 0.62 | 0.18 | 5 | 0.71 | 0.10 | 7 | 0.59 | 0.21 | .5 |
| Length of 5’ free tail | 60 | 4.08 | 3.81 | 5 | 2.40 | 3.91 | 7 | 6.86 | 6.20 | .3 |
| Length of 3’ free tail | 60 | 5.35 | 4.84 | 5 | 6.00 | 2.55 | 7 | 5.00 | 5.66 | .6 |
| SD: standard deviation | | | | | | | | | | |

| Supplemental Table 4. Multinomial logistic regression model for determinant factors of co-factor dominancy in mouse APOBEC1-dependent C-to-U mRNA editing sites. | | | |
| --- | --- | --- | --- |
| Determinant of co-factor dominancy | Subgroup | Coefficient (95% CI) | *P* value |
| A1CF-dominant vs RBM47-dominant | | | |
| Tissue | Small intestine | Reference | |
| Liver | 4.40 [0.34, 5.21] | .04 |
| Location of edited cytosine | Loop | Reference |  |
| Stem | -3.88 [-8.31, 0.55] | 0.08 |
| Tail | -19.13 [-25.82, -12.44] | <0.001 |
| Mismatches in mooring sequence | per unit increments | 0.30 [-0.97, 1.57] | 0.6 |
| Mismatches in regulatory sequence motif B | per unit increments | 1.62 [0.063, 3.30] | .05 |
| Mismatches in regulatory sequence motif C | per unit increments | 0.12 [-0.83, 1.08] | .8 |
| AU content (%) of regulatory sequence motif D | per unit increments | 0.17 [-0.04, 0.39] | 0.1 |
| AU content (%) of downstream sequence +1 to +5 | per unit increments | -0.02 [-0.09, 0.04] | 0.5 |
| AU content (%) of downstream sequence +6 to +10 | per unit increments | -0.06 [-0.1, -0.02] | 0.006 |
| AU content (%) of downstream sequence +11 to +15 | per unit increments | -0.06 [-0.18, 0.07] | 0.4 |
| Co-dominant vs RBM47-dominant | | | |
| Tissue | Small intestine | Reference | |
| Liver | -1.73 [-6.00, 2.50] | 0.4 |
| Location of edited cytosine in secondary structure | C loop | Reference | |
| C stem | 1.70 [-2.11, 5.51] | 0.4 |
| C tail | 3.70 [0.72, 6.67] | 0.01 |
| Mismatches in mooring sequence | per unit increments | 0.66 [0.01, 1.33] | .05 |
| Mismatches in regulatory sequence motif B | per unit increments | -2.32 [-3.86, -0.79] | .003 |
| Mismatches in regulatory sequence motif C | per unit increments | 3.16 [1.12, 5.21] | 0.002 |
| AU content (%) of regulatory sequence motif D | per unit increments | 0.13 [0.02, 0.24] | 0.02 |
| AU content (%) of downstream sequence +1 to +5 | per unit increments | -0.17 [-0.35, -0.01] | 0.04 |
| AU content (%) of downstream sequence +6 to +10 | per unit increments | -0.10 [-0.28, 0.07] | 0.25 |
| AU content (%) of downstream sequence +11 to +15 | per unit increments | -0.10 [-0.19, -0.01] | 0.03 |
| Co-dominant vs A1CF -dominant | | | |
| Tissue | Small intestine | Reference |  |
| Liver | -6.13 [-10.60, -0.31] | 0.04 |
| Location of edited cytosine in secondary structure | C loop | Reference |  |
| C stem | 5.58 [0.06, 9.22] | 0.05 |
| C tail | 22.83 [15.53, 30.12] | <0.001 |
| Mismatches in mooring sequence | per unit increments | 0.36 [-0.87, 1.59] | 0.6 |
| Mismatches in regulatory sequence motif B | per unit increments | -3.94 [-6.27, -1.61] | 0.001 |
| Mismatches in regulatory sequence motif C | per unit increments | 3.04 [0.91, 5.16] | 0.005 |
| AU content (%) of regulatory sequence motif D | per unit increments | -0.04 [-0.29, 0.20] | 0.72 |
| AU content (%) of downstream sequence +1 to +5 | per unit increments | -0.15 [-0.32, 0.02] | 0.09 |
| AU content (%) of downstream sequence +6 to +10 | per unit increments | -0.04 [-0.22, 0.13] | 0.62 |
| AU content (%) of downstream sequence +11 to +15 | per unit increments | -0.04 [-0.19, 0.11] | 0.58 |
| Model parameters: N=72; Pseudo R2= 0.59; *P*<.001  CI: confidence interval | | | |
